# Supplementary material for: Photophysical property change of N-(5-bromo-salicylidene)-3-aminoethylpyridine monohydrated crystals via dehydration phase transition
Source: publisher site journal article supplement (doi:10.1515/zkri-2020-0091), 2021-01-22
Supplement: Supplementary file 1 [file j_zkri-2020-0091_suppl_001.docx]

Supporting Information

**Photophysical property change of *N*-(5-Bromo-salicylidene)-3-aminoethylpyridine monohydrated crystals via dehydration phase transition**

**Haruki Sugiyama***

Research and Education Center for Natural Sciences, Keio University, Hiyoshi 4-1-1, Kohoku, Yokohama

1H-NMR Spectrum (400 MHz, CDCl3 with TMS)


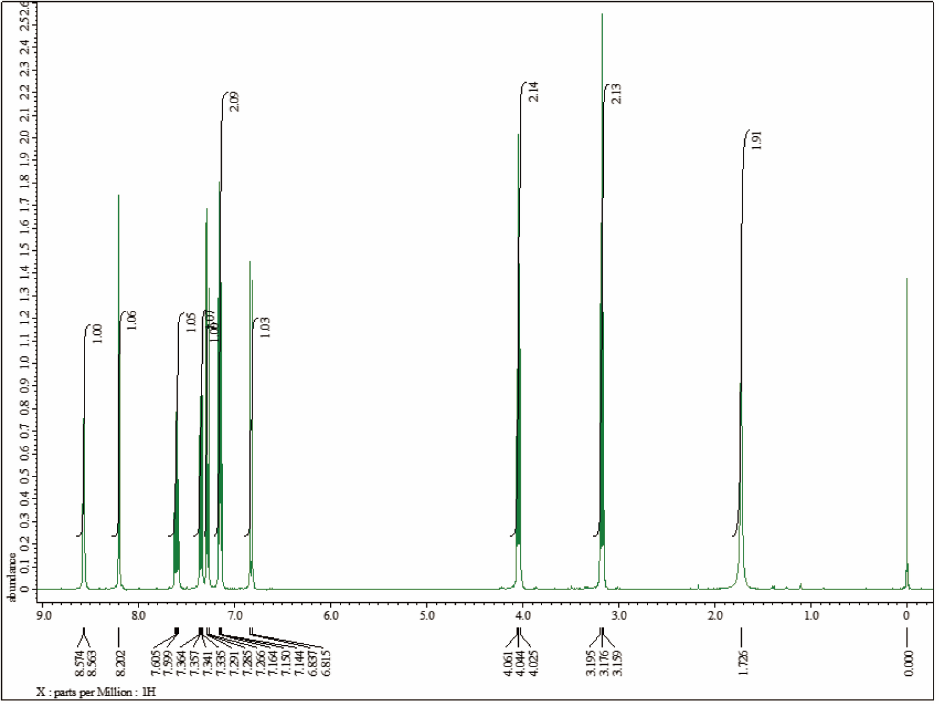
Sample : **1A**


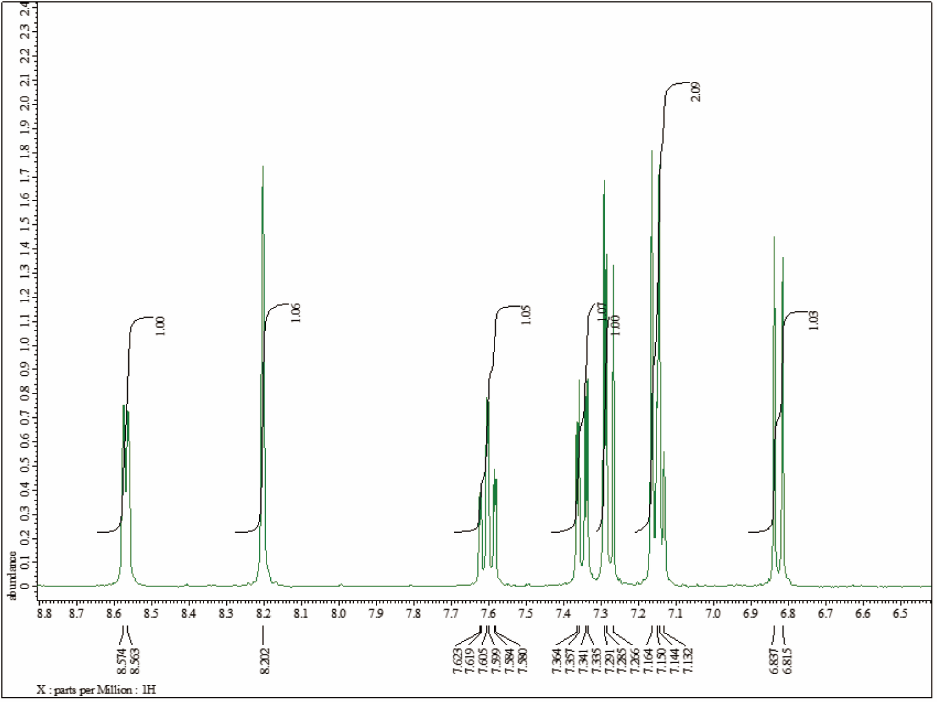


| Assign. | Shift (ppm) |
| --- | --- |
| a | 8.57 |
| b | 7.16-7.13 |
| c | 7.60 |
| d | 7.16-7.13 |
| e | 3.18 |
| f | 4.04 |
| g | 8.20 |
| h | 7.29 |
| i | 7.35 |
| j | 6.83 |

Figure and Tables

Captions

Table S1 Tortion angles, dihedral angles, and Kitaigorodskii packing index(K.P.I.)*.*

Table S2 Calculated HOMO-LUMO energy gaps.

Figure S1 Photochromic reaction process is illustrated by a yellow line form the enol to *trans*-keto form. On the other hand, ESIPT fluorescence process is illustrated by a green line.

Figure S2 The molecular stacking via weak C-H…π and π-π interaction in the crystal structure of **1H**.

Figure S3 Intermolecular interaction in the crystal structure of **1A**; the C-H…O hydrogen bonding (a) and C-H…N hydrogen bonding (b).

Figure S4 Some weak C-H…π interactions in the crystal structure of **1A**.

Figure S5 Structure overlay of the 5Br-SAEP molecules in **1H** (red) and **1A** (blue and green).

Figure S6 Powder X-ray diffraction patterns of **1H** after 2, 4, 6 hours, 1 week and 2 weeks. The result pattern change suggested that **1H** transformed gradually to **1A** under an ambient condition (25 °C, 70% R.H.).

Figure S7 TG-DTA curves of **1H**. The weight loss of 5.39% at 46.8 °C was consisitent with the desorption of one water molecule.

Figure S8TG-DTA curves of **1A.** There is no change in the sample weight up to 150 °C. An endothermic peak at 72.2 °C is due to the sample melt.

Figure S9 Powder X-ray diffraction patterns of **1H** after storing under the several humidity conditions, 23, 43, 70, 76, and 85 % R.H. for one week. Pink arrows suggested the appearance of the unknown intermediate phase.

Figure S10 Powder X-ray diffraction patterns of **1H** after storing under the several humidity conditions, 23, 43, 70, 76, and 85 % R.H. for one month.

Figure S11 Normalized emission spectra in the solid-state of **1A** with excitation wavelength of 365(blue), 400(orange), and 420(green) nm. Because I used other sample holder, the spectrum shape was slightly different compared to Figure 6.

Figure S12 Calculated HOMO and LUMO orbital of the enol form.

Figure S13 Calculated HOMO and LUMO orbital of the *cis*-keto form.

Table S1 Tortion angles, dihedral angles, and Kitaigorodskii packing index (K.P.I.).

|  | **1H** | **1A** | | **3OMe-SAEA**  (QEYFAC) | **4OMe-SAEA**  (QEVSOA) |
| --- | --- | --- | --- | --- | --- |
| C8=N9-C10-C11 / ° | 105.6(2) | 107.0(3) | 103.4(3) | 110.9(4) | 110.0(2) |
| N9-C10-C11-C12 / ° | -179.9(2) | 176.4(2) | 166.5(2) | -175.3(3) | 171.6(1) |
| C10-C11-C12-C13 / ° | -112.7(2) | 103.0(3) | 99.2(3) | -97.8(5) | 2.6(2) |
| Dihedral angle between two aromatic rings/ ° | 9.49(10) | 31.16(13) | 18.06(14) | 12.7(2) | 68.91(8) |
| K.P.I. | 68.3 | 68.6  **SAEP**  **SAEA** |  | 67.8 | 68.8 |

Table S1 Calculated HOMO-LUMO energy gaps

|  | HOMO(eV) | LUMO(eV) | Gap (eV) |
| --- | --- | --- | --- |
| enol form |  |  |  |
| 1H | -6.12 | -1.75 | 4.37 |
| 1A-Mol.A | -6.14 | -1.79 | 4.35 |
| 1A-Mol.B | -6.14 | -1.78 | 4.36 |
|  |  |  |  |
| cis-keto form |  |  |  |
| 1H | -5.49 | -2.02 | 3.47 |
| 1A Mol.A | -5.50 | -2.04 | 3.46 |
| 1A Mol.B | -5.50 | -2.04 | 3.46 |


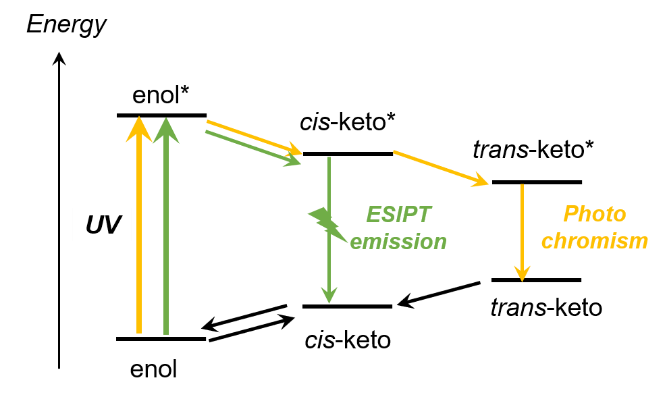


Figure S1


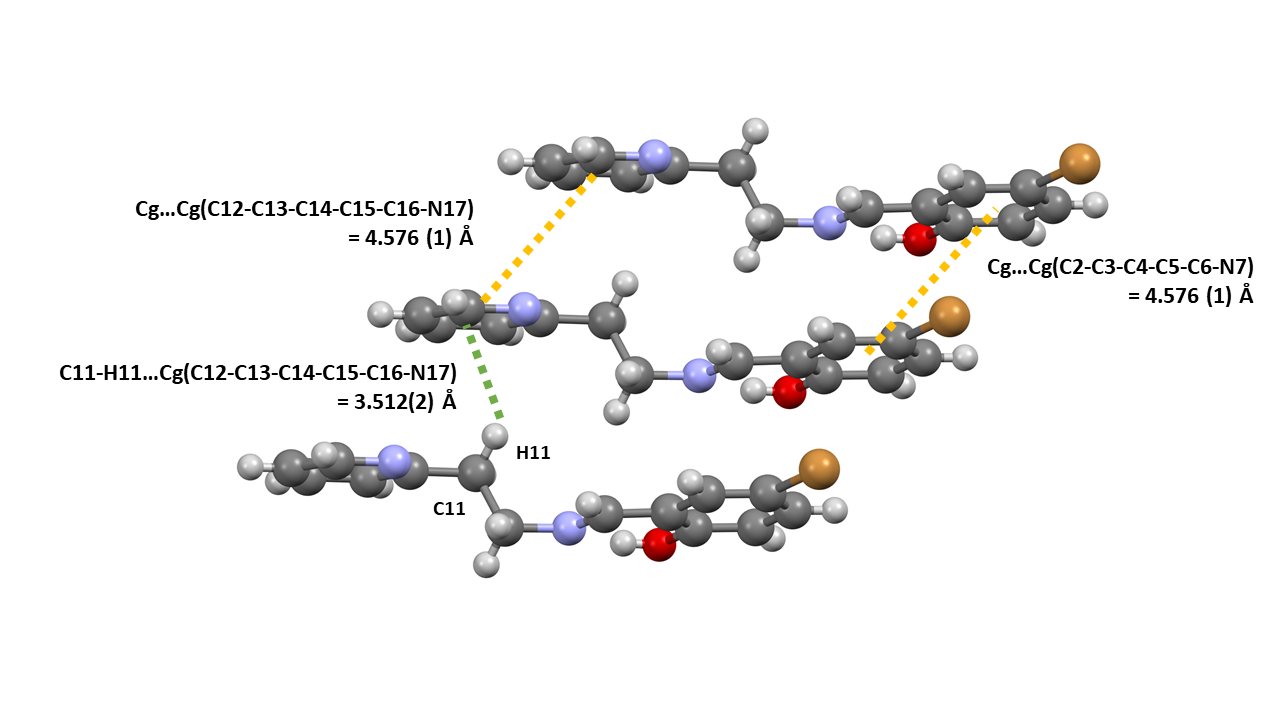


Figure S2


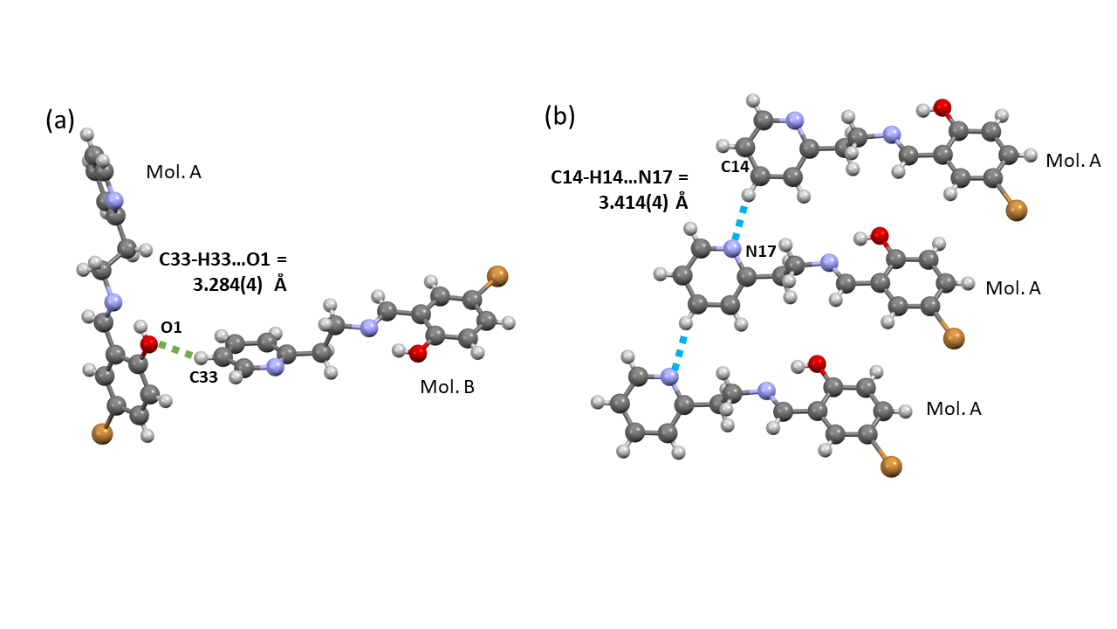


Figure S3
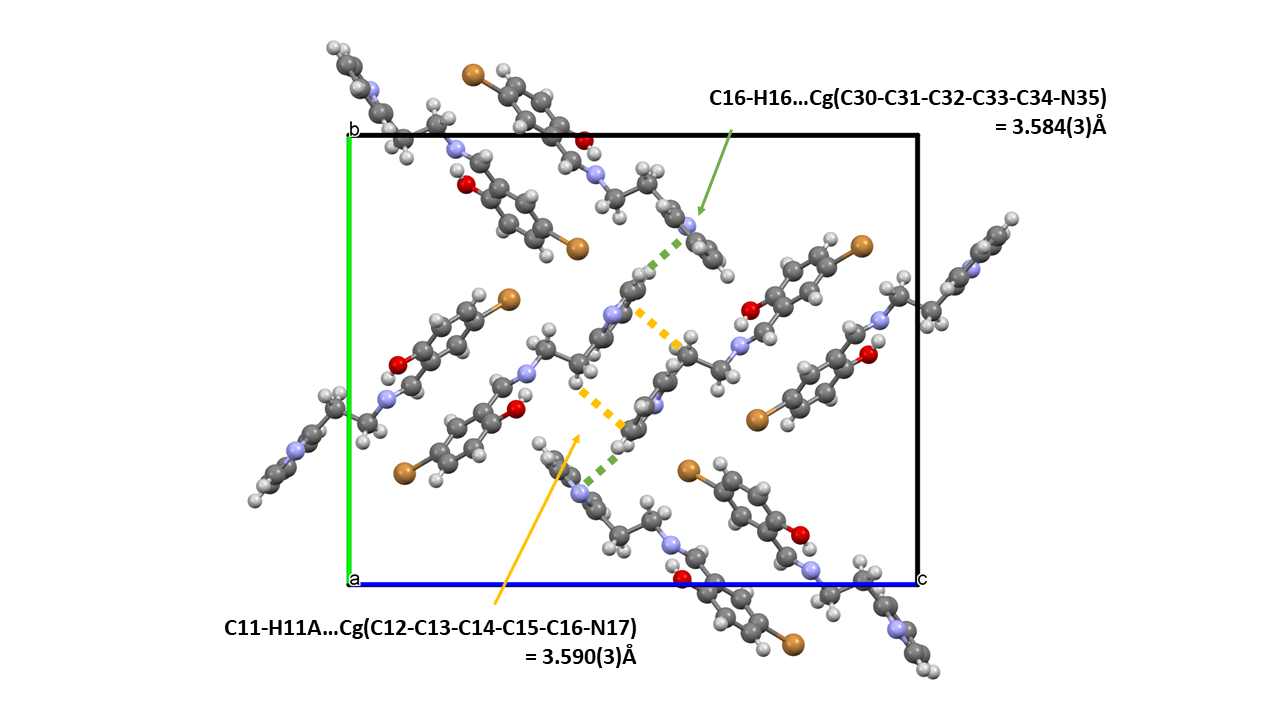


Figure S4


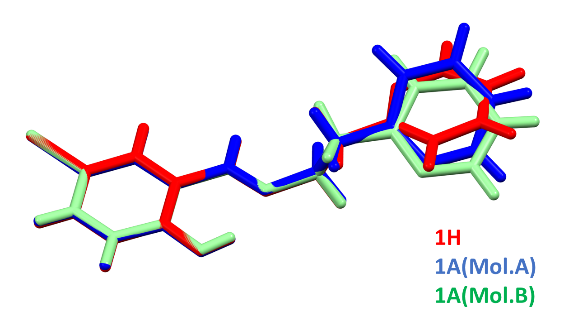


Figure S5


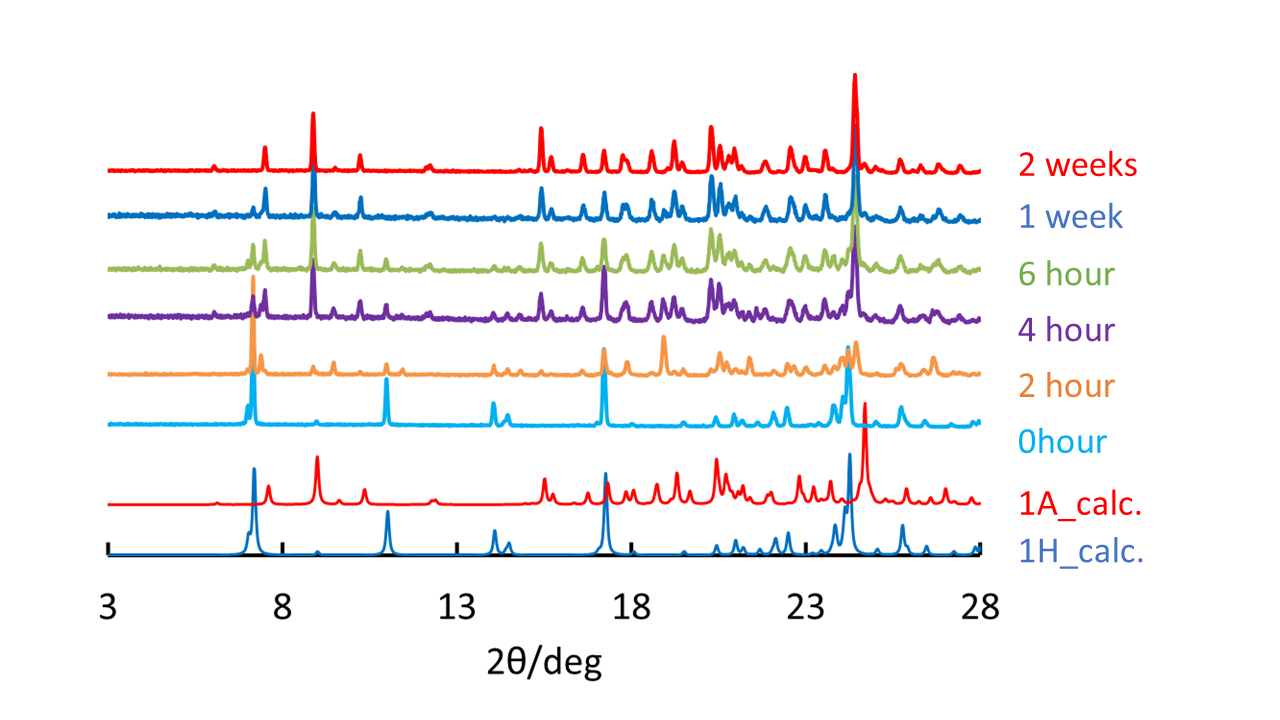


Figure S6


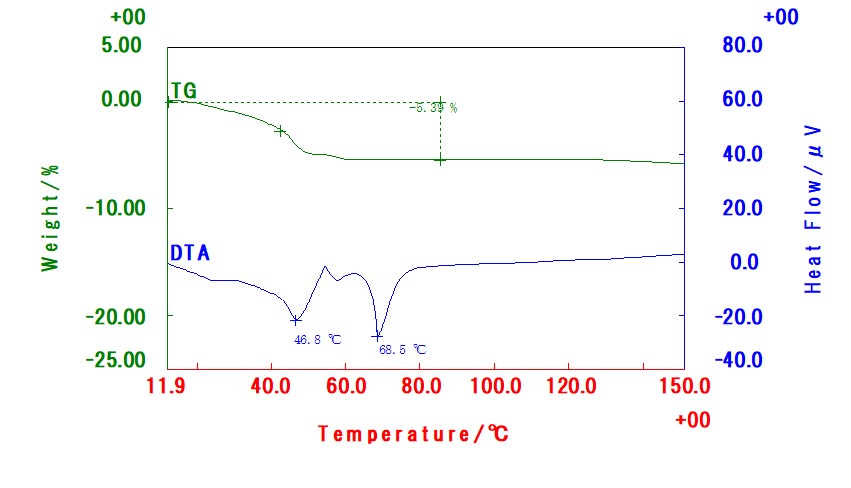
 Figure S7


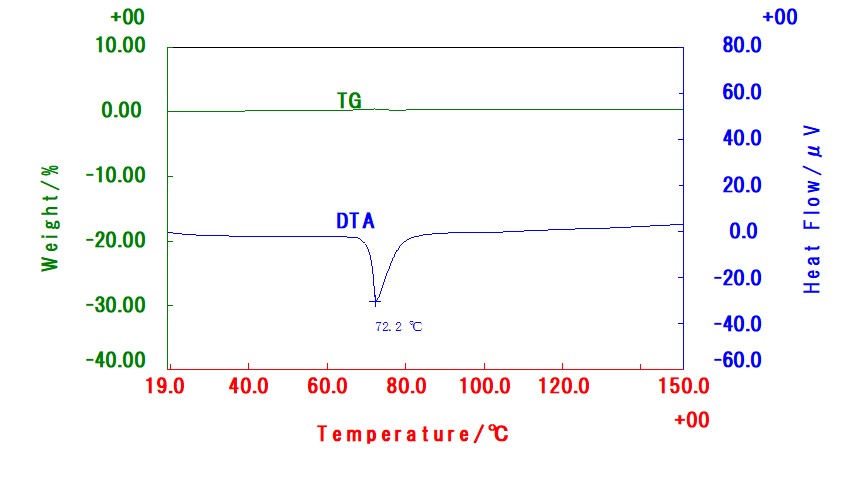


Figure S8


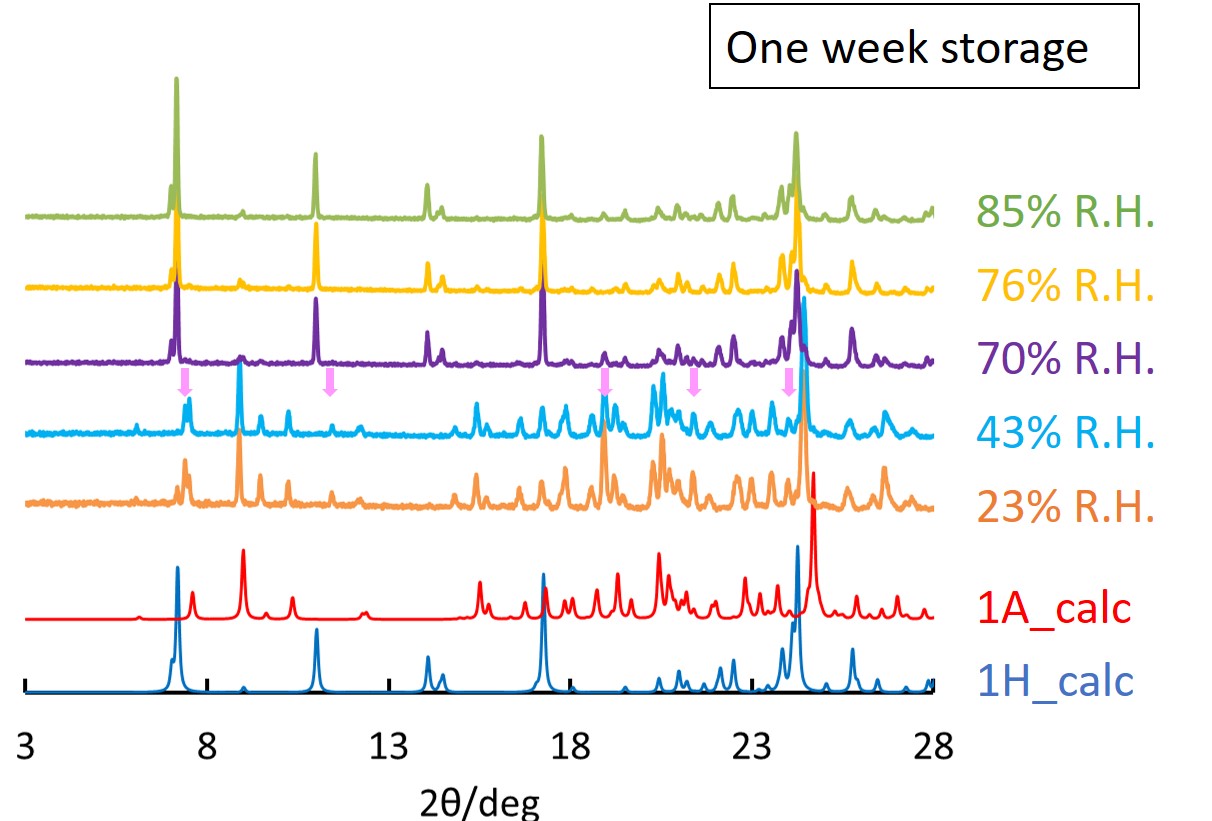


Figure S9


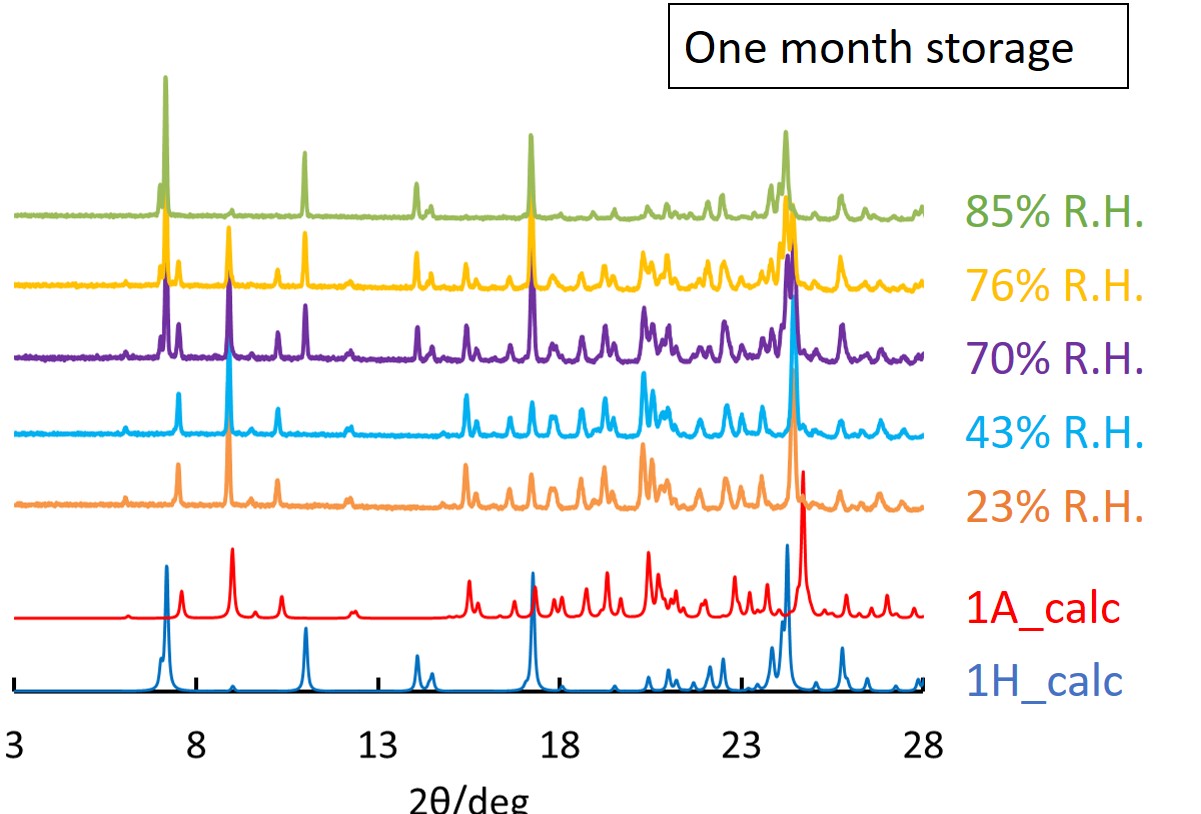


Figure S10


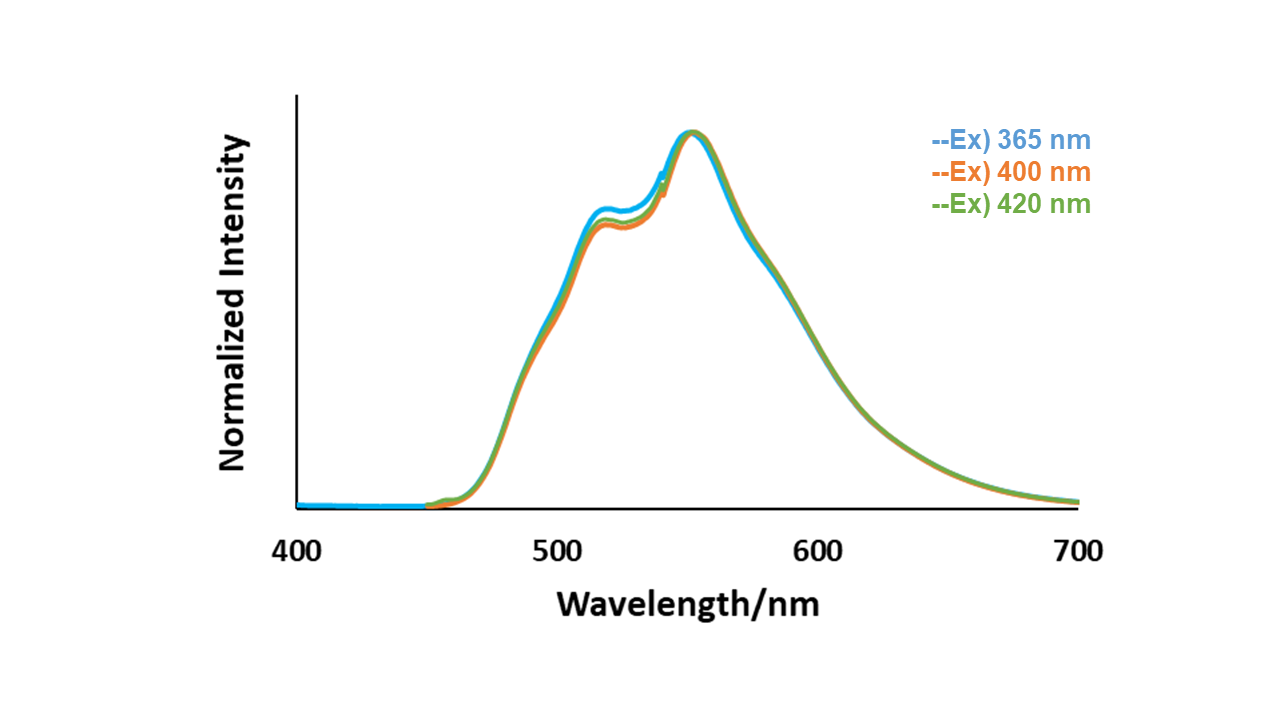


Figure S11


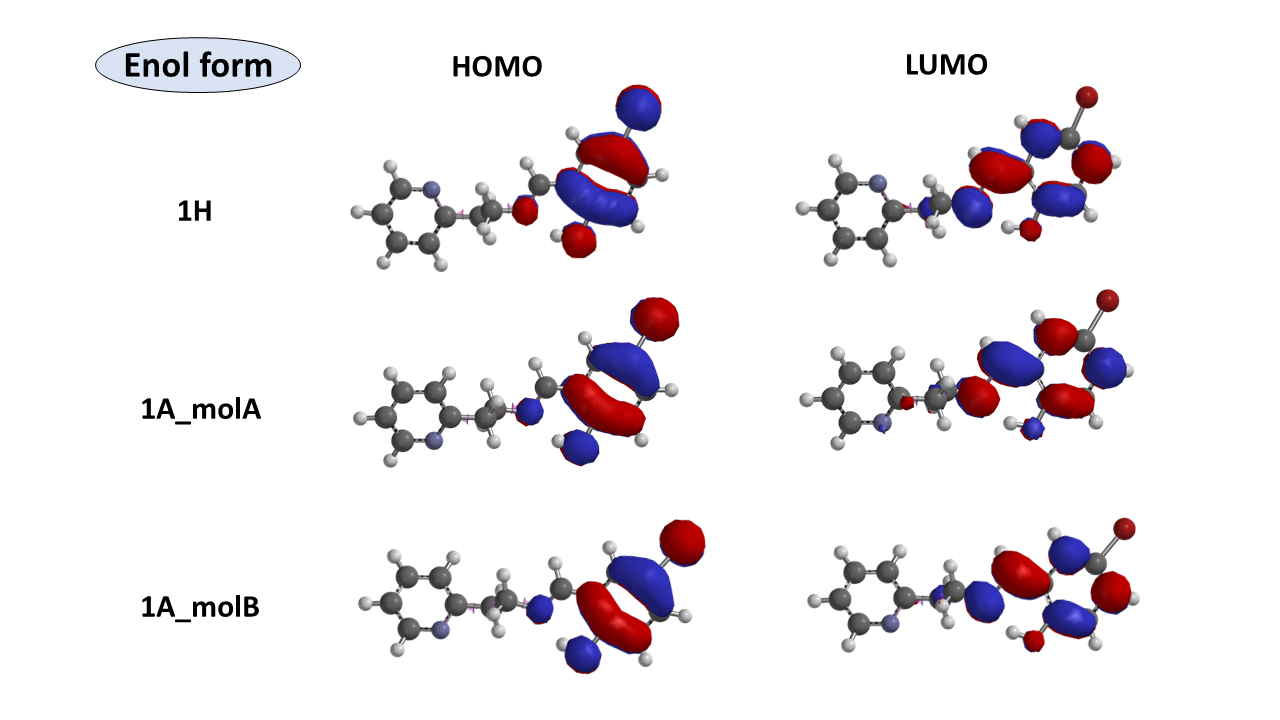


Figure S12


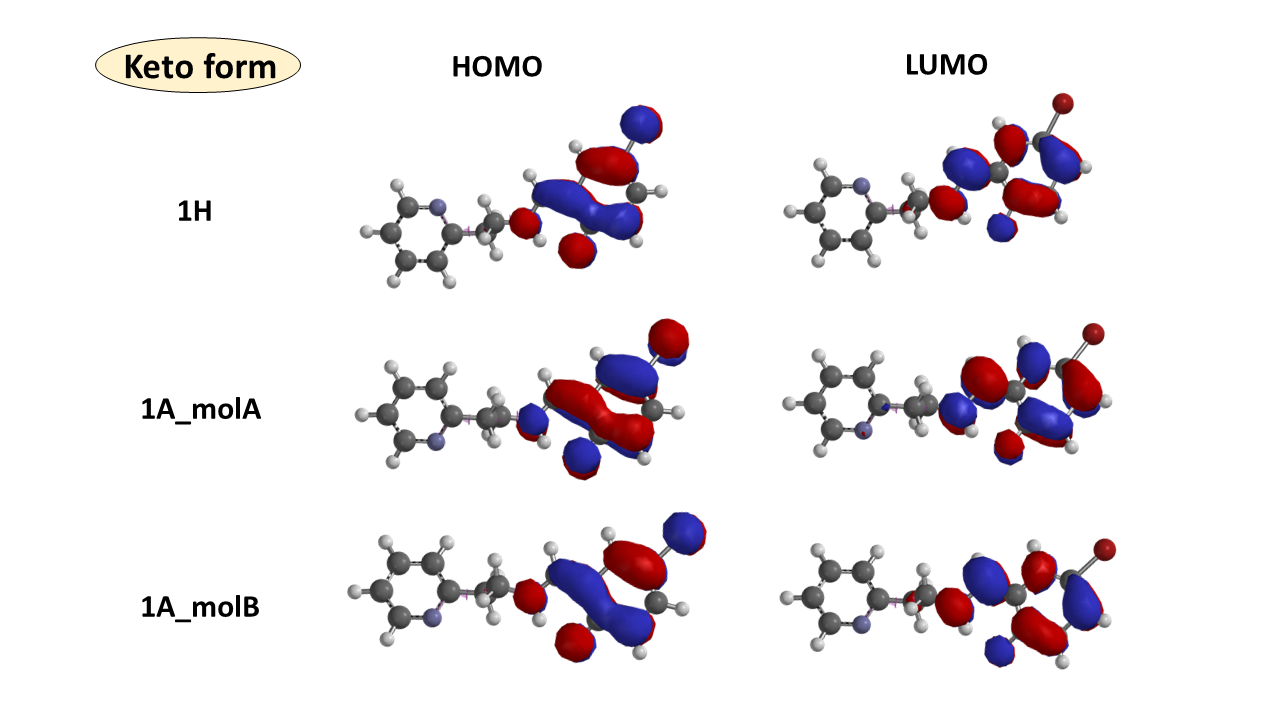


Figure S13
